# Supplementary material for: High-energy blunt pelvic ring injury incidence and polytrauma caseload in a single level I trauma center during COVID-19 related pseudo-lockdown measures: a retrospective cohort study based on a prospective registry
Source: Eur J Med Res. 2023 Sep 8;28:325. doi: 10.1186/s40001-023-01313-1 (PMC10486067; doi:10.1186/s40001-023-01313-1)
Supplement: Supplementary file 2 — Additional file 2. Pelvic ring injury patients database. [file 40001_2023_1313_MOESM2_ESM.xlsx]

## Sheet: Data
ID	Accident_date	Year	Accident_date_monthly_coded	Accident_date_bi-monthly_coded	Residence	Age	Gender	Trauma_mechanism	ISS	Survivor	Δ_day_to_death	ICU	ICU_stay	Hosp_length	HD_Instability	PRBC_ED	PRBC_first_24_hours	Complications	AO_classification	YB_Classification	Associated injuries AIS Head & Neck	Associated Injuries AIS Face	Associated Injuries AIS Chest	Associated Injuries AIS Abdomen	Associated Injuries AIS Extremity	Associated Injuries AIS External
1	2014-01-04	2014	1	11	1	22.8329	1	4	20	1		1	16	19	0	0	8	0	2	1	4	0	0	0	2	0
2	2014-01-23	2014	1	12	1	18.2822	1	4	14	1		1	3	13	0	0	0	1	1	9	1	0	3	0	2	0
3	2014-03-19	2014	3	32	0	55.8986	1	4	13	1		0	0	2	0	0	0	0	1	9	3	0	0	0	2	0
4	2014-04-09	2014	4	41	1	38.8603	1	5	9	1		0	0	1	0	0	0	0	1	1	0	0	0	0	3	0
5	2014-04-11	2014	4	41	1	41.1397	0	6	29	1		0	0	6	0	0	0	0	2	3	0	0	3	2	4	0
6	2014-04-16	2014	4	42	1	58.0137	0	3	50	0	1	0	0	1	1	7	40	1	3	8	1	0	3	4	5	0
7	2014-05-09	2014	5	51	1	26.537	1	3	9	1		0	0	14	0	0	0	0	2	1	0	0	0	0	3	0
8	2014-05-19	2014	5	52	0	48.6055	1	5	66	1		1	18	18	1	4	6	1	2	3	5	2	4	3	5	0
9	2014-05-28	2014	5	52	1	68.5507	1	5	34	1		1	22	54	0	0	1	1	2	1	3	0	4	3	2	0
10	2014-06-20	2014	6	62	1	44.3315	0	5	38	1		1	6	52	0	0	0	0	1	9	5	0	3	2	2	0
11	2014-06-25	2014	6	62	1	71.6658	0	5	38	0	21	1	15	21	0	0	5	1	2	5	1	0	3	2	5	0
12	2014-07-16	2014	7	72	0	76.0932	1	4	27	0	1	0	0	1	0	0	0	0	2	1	3	0	3	0	3	0
13	2014-07-25	2014	7	72	0	20.2986	0	1	50	0	1	1	1	1	1	0	7	1	2	3	4	0	5	3	3	0
14	2014-08-04	2014	8	81	1	43.9151	0	5	22	1		1	1	64	0	0	0	0	2	1	15	2	3	0	3	0
15	2014-08-28	2014	8	82	1	54.0219	0	5	27	1		1	12	20	0	0	0	1	2	2	3	3	3	0	3	0
16	2014-09-01	2014	9	91	1	34.5616	0	3	25	1		0	0	14	0	0	0	0	3	7	0	0	3	0	4	0
17	2014-09-01	2014	9	91	1	45.8164	0	2	13	1		0	0	9	0	0	0	0	2	5	0	0	0	2	3	0
18	2014-09-11	2014	9	91	1	33.8164	0	5	17	0	7	1	7	7	1	2	2	1	1	9	3	0	2	2	2	0
19	2014-09-16	2014	9	92	0	35.0658	0	2	22	1		0	0	8	0	0	0	0	2	1	2	0	3	2	3	0
20	2014-10-07	2014	10	101	0	75.9315	0	1	17	1		1	7	7	1	2	2	0	1	9	0	0	3	2	2	0
21	2014-10-08	2014	10	101	1	48.5945	1	4	17	1		0	0	1	0	0	0	0	2	1	2	0	2	0	3	0
22	2014-10-15	2014	10	101	1	56.4986	1	4	18	1		0	0	20	0	0	0	0	2	1	3	0	0	0	3	0
23	2014-10-17	2014	10	102	0	25.5534	0	5	13	1		0	0	13	0	0	0	0	3	8	0	0	0	2	3	0
24	2014-10-23	2014	10	102	0	39.4767	1	5	29	1		1	4	33	0	0	2	0	1	9	3	0	4	2	2	2
25	2014-10-27	2014	10	102	0	57.4438	0	2	20	1		1	1	10	0	0	2	0	3	6	0	0	0	2	4	0
26	2014-10-28	2014	10	102	0	46.0411	0	1	22	1		1	7	34	0	0	4	1	2	1	2	0	3	2	3	0
27	2014-11-04	2014	11	111	1	72.5699	1	4	27	1		1	1	9	0	0	0	0	2	1	3	2	3	2	3	0
28	2014-11-23	2014	11	112	1	26.6986	0	5	29	1		1	12	105	1	3	4	0	3	8	0	0	3	2	4	0
29	2015-02-25	2015	2	22	0	87.9041	1	4	17	1		0	0	1	0	0	0	0	2	2	0	0	2	2	3	0
30	2015-03-05	2015	3	31	0	69.2795	1	5	45	1		1	6	13	0	0	3	0	1	9	5	0	4	0	2	0
31	2015-04-10	2015	4	41	1	34.6795	0	3	21	1		0	0	11	0	0	0	0	2	1	2	1	0	0	4	0
32	2015-04-10	2015	4	41	1	19.4	1	5	25	1		0	0	13	0	0	0	1	2	1	0	0	4	0	3	0
33	2015-05-04	2015	5	51	1	50.7178	0	6	13	1		0	0	7	0	0	0	0	2	1	0	0	0	2	3	0
34	2015-05-27	2015	5	52	1	19.2	1	4	16	1		0	0	7	0	0	0	0	2	1	0	0	0	0	4	0
35	2015-05-31	2015	5	52	1	69.8959	1	5	17	1		1	16	108	0	0	0	1	1	9	2	2	2	0	3	0
36	2015-06-02	2015	6	61	0	45.7918	1	2	29	0	1	1	1	1	1	9	31	1	1	9	2	0	3	4	2	0
37	2015-06-17	2015	6	62	1	35.8521	0	5	22	1		1	2	12	0	0	0	0	1	9	3	3	0	1	2	0
38	2015-07-01	2015	7	71	1	74.8932	1	5	43	1		1	39	83	1	2	4	0	3	8	3	3	0	2	5	0
39	2015-07-07	2015	7	71	1	87.7315	0	5	22	1		0	0	13	0	0	0	1	2	2	2	0	3	0	3	0
40	2015-07-10	2015	7	71	1	61.0082	0	2	14	1		1	5	14	0	0	0	1	1	9	1	0	3	0	2	0
41	2015-07-12	2015	7	71	0	41.8301	0	5	50	1		1	73	74	1	6	56	1	3	8	4	0	3	3	5	0
42	2015-07-13	2015	7	71	0	39.4247	1	2	43	1		1	8	8	1	2	2	0	3	8	3	2	2	3	5	0
43	2015-07-18	2015	7	72	1	39.7	1	5	13	1		0	0	12	0	0	0	0	2	1	2	0	0	0	3	0
44	2015-07-20	2015	7	72	1	21.1397	1	1	34	1		1	19	42	1	2	2	1	2	1	0	3	2	3	4	0
45	2015-07-20	2015	7	72	1	42	1	2	13	1		0	0	22	0	0	0	0	2	1	0	0	0	0	3	1
46	2015-07-24	2015	7	72	0	39.737	0	2	34	1		1	3	12	0	0	0	0	2	1	4	3	3	3	3	0
47	2015-08-13	2015	8	81	0	25.7616	0	5	29	1		1	1	5	0	0	0	0	1	9	2	0	4	3	2	0
48	2015-08-25	2015	8	82	0	55.2603	0	6	29	1		1	30	31	1	4	16	1	2	3	0	0	0	2	5	0
49	2015-09-07	2015	9	91	1	27.8384	1	5	17	1		1	8	23	0	0	0	0	2	2	0	0	2	2	3	0
50	2015-09-15	2015	9	91	1	76.7808	0	5	17	1		0	0	10	0	0	0	0	1	9	2	0	3	0	2	0
51	2015-09-19	2015	9	92	1	63.7	0	5	17	1		1	2	21	0	0	2	0	2	1	2	0	2	2	3	0
52	2015-09-29	2015	9	92	0	55.2767	0	2	29	1		1	13	14	0	0	2	0	3	8	0	0	3	2	4	0
53	2015-10-08	2015	10	101	1	37.5178	0	5	24	1		1	4	40	0	0	1	0	2	5	2	0	1	2	4	0
54	2015-10-18	2015	10	102	1	49.0603	0	5	20	1		0	0	16	0	0	0	0	3	8	0	0	0	2	4	0
55	2015-11-02	2015	11	111	1	22.2959	0	5	17	1		1	2	11	0	0	0	1	2	2	0	0	2	2	3	0
56	2015-11-04	2015	11	111	1	18.5562	0	2	41	1		1	6	35	1	2	5	1	1	9	3	1	4	4	2	0
57	2015-11-21	2015	11	112	1	21.4055	1	5	34	1		1	9	26	1	4	7	0	2	1	0	0	3	0	5	0
58	2015-11-22	2015	11	112	0	48.8438	0	5	34	1		1	2	4	0	0	1	1	2	1	5	0	0	0	3	0
59	2015-11-29	2015	11	112	1	24.937	0	5	34	1		1	6	85	0	0	5	0	3	8	3	0	3	2	4	0
60	2016-01-04	2016	1	11	1	23.5507	1	5	45	1		1	9	191	0	0	2	1	1	9	0	0	4	5	2	0
61	2016-02-03	2016	2	21	1	25.5781	1	5	43	1		1	12	29	1	5	5	1	2	1	5	0	3	3	3	0
62	2016-02-22	2016	2	22	1	27.0027	1	4	22	1		0	0	8	0	0	0	0	2	2	3	0	2	0	3	0
63	2016-03-06	2016	3	31	0	32.7699	0	5	50	0	1	0	0	1	1	4	4	0	2	3	5	1	3	4	3	0
64	2016-04-12	2016	4	41	1	52.789	1	5	18	1		0	0	51	0	0	0	1	2	2	3	0	0	0	3	0
65	2016-04-12	2016	4	41	1	21.1123	0	2	38	1		1	2	27	0	0	0	0	2	1	2	0	5	0	3	0
66	2016-05-03	2016	5	51	1	63.9205	0	5	27	0	51	1	48	51	1	3	9	1	2	1	3	3	0	2	3	0
67	2016-05-03	2016	5	51	0	22.2767	1	5	27	1		1	1	24	0	0	0	0	2	8	3	0	2	3	3	0
68	2016-05-04	2016	5	51	1	36.6466	0	2	22	1		0	0	7	0	0	0	0	2	1	0	0	3	2	3	0
69	2016-05-05	2016	5	51	1	24.5233	1	5	54	0	2	1	2	2	1	3	3	0	2	2	5	0	2	0	5	0
70	2016-05-22	2016	5	52	1	46.0904	0	5	13	1		1	1	11	0	0	0	0	2	5	0	0	0	2	3	0
71	2016-06-10	2016	6	61	1	71.8384	0	4	24	1		1	5	20	0	0	4	0	3	6	0	0	2	2	4	0
72	2016-06-20	2016	6	62	0	28.1151	0	1	43	1		1	23	23	1	2	2	1	2	1	5	0	3	3	3	0
73	2016-07-02	2016	7	71	0	26.8055	1	5	29	1		1	2	17	0	0	0	1	3	8	0	0	3	2	4	0
74	2016-07-06	2016	7	71	0	55.8329	0	5	22	1		1	3	13	0	0	0	0	1	9	0	0	3	3	2	0
75	2016-07-08	2016	7	71	1	17.8329	0	5	29	1		1	1	7	0	0	0	0	2	1	2	0	3	0	4	0
76	2016-07-17	2016	7	72	1	29.9205	1	5	21	1		1	9	36	0	0	0	1	3	8	0	1	0	2	4	0
77	2016-07-28	2016	7	72	0	44.3808	0	5	9	1		0	0	14	0	0	0	0	2	2	0	0	0	0	3	0
78	2016-08-29	2016	8	82	1	59.0493	0	5	33	1		1	6	15	0	0	3	0	2	2	1	0	4	0	4	0
79	2016-09-02	2016	9	91	1	81.1863	1	5	43	1		0	0	2	0	0	0	0	2	1	5	0	3	0	3	0
80	2016-10-06	2016	10	101	0	37.7	1	4	17	1		0	0	21	0	0	0	0	2	1	2	0	2	2	3	0
81	2016-10-20	2016	10	102	1	49.2932	1	4	13	1		0	0	4	0	0	0	0	2	4	2	0	0	0	3	0
82	2016-11-06	2016	11	111	1	68.0904	0	9	38	0	7	1	7	7	0	0	6	0	1	9	5	0	3	0	2	0
83	2016-11-08	2016	11	111	1	56.3068	1	4	43	0	19	1	19	19	1	2	6	1	2	1	5	3	3	0	3	0
84	2016-12-11	2016	12	121	1	52.5781	1	2	36	1		1	7	11	0	0	0	0	2	2	0	0	4	2	4	0
85	2016-12-13	2016	12	121	1	27.9041	0	5	22	1		1	8	28	0	0	0	1	1	9	0	0	3	3	2	0
86	2016-12-22	2016	12	122	1	69.2712	0	5	29	0	23	1	7	15	0	0	10	0	2	2	0	0	3	2	4	0
87	2017-01-10	2017	1	11	1	28.7	0	1	43	1		0	0	14	0	0	2	0	2	2	1	0	3	5	3	0
88	2017-03-01	2017	3	31	1	30.3	1	4	5	1		0	0	15	0	0	0	1	2	1	0	0	1	0	2	0
89	2017-03-03	2017	3	31	1	33.2	0	5	59	1		1	46	167	1	7	19	1	2	1	3	0	5	5	3	0
90	2017-03-12	2017	3	31	1	58	0	5	17	1		0	0	8	0	0	0	0	2	1	2	0	3	0	2	0
91	2017-03-17	2017	3	32	0	51.2	0	5	5	1		0	0	5	0	0	0	0	2	1	0	0	0	1	2	0
92	2017-04-08	2017	4	41	1	18.6	0	5	27	1		1	24	108	1	1	7	1	2	2	0	0	3	3	3	0
93	2017-04-23	2017	4	42	1	54.1	0	2	34	1		1	3	9	0	0	0	0	1	9	0	0	4	3	3	0
94	2017-05-05	2017	5	51	1	78	0	4	34	1		1	8	41	0	0	0	1	2	1	3	0	3	0	4	0
95	2017-05-05	2017	5	51	1	48.2	1	5	22	1		0	0	11	0	0	0	0	2	4	3	0	2	3	3	0
96	2017-05-13	2017	5	51	1	76.4	0	4	41	1		1	26	52	1	6	10	0	2	2	4	4	3	0	3	0
97	2017-05-20	2017	5	52	1	56.6	1	1	18	1		0	0	1	0	0	0	0	2	1	0	0	3	0	3	0
98	2017-05-24	2017	5	52	1	52.3	1	5	34	1		1	7	104	1	4	4	0	3	8	3	0	2	3	4	0
99	2017-05-26	2017	5	52	0	53.3	1	2	24	1		0	0	19	0	0	0	0	3	6	0	0	2	2	4	0
100	2017-05-27	2017	5	52	1	20.7	0	2	20	1		0	0	13	0	0	0	0	2	1	0	0	0	2	4	0
101	2017-06-09	2017	6	61	1	25.4	0	4	66	0	1	1	0	1	1	10	10	1	2	3	5	1	4	0	5	0
102	2017-06-21	2017	6	62	0	49.1	0	6	24	1		1	4	33	0	0	0	0	3	8	2	2	0	2	4	0
103	2017-06-28	2017	6	62	0	49.6	0	2	10	1		0	0	9	0	0	0	0	2	5	1	0	0	0	3	0
104	2017-06-29	2017	6	62	1	53.8	1	5	38	1		1	14	163	1	0	0	1	2	5	0	0	3	2	5	0
105	2017-07-14	2017	7	71	1	26.7	0	5	17	1		1	12	20	0	0	0	0	1	9	3	2	0	2	2	0
106	2017-07-15	2017	7	71	1	20.7	1	5	13	1		0	0	82	0	0	0	1	2	3	0	0	0	2	3	0
107	2017-07-22	2017	7	72	1	80.5	0	5	18	0	52	0	0	52	0	0	0	1	2	2	0	0	3	0	3	0
108	2017-07-31	2017	7	72	1	50.2	1	1	14	1		0	0	33	0	0	0	0	2	1	0	0	0	2	3	1
109	2017-08-05	2017	8	81	1	22.9	0	5	22	1		1	8	19	0	0	0	0	2	1	0	2	3	0	3	0
110	2017-08-09	2017	8	81	1	32.3	1	1	41	1		1	36	138	1	4	4	0	2	5	0	0	3	4	4	0
111	2017-08-18	2017	8	82	0	57.5	0	6	16	1		1	5	90	1	0	0	1	2	3	0	0	0	0	4	0
112	2017-08-19	2017	8	82	1	38.6	0	2	19	1		0	0	19	0	0	0	0	2	1	1	0	3	0	3	0
113	2017-08-31	2017	8	82	0	31.5	1	3	17	1		0	0	6	0	0	0	0	1	9	0	0	3	2	2	1
114	2017-09-13	2017	9	91	1	30.4	0	2	43	0	1	0	0	1	1	14	26	1	3	6	3	1	3	2	5	0
115	2017-09-15	2017	9	91	1	61.1	0	1	22	1		1	16	27	0	0	0	0	1	9	2	3	2	3	2	0
116	2017-09-30	2017	9	92	1	66.7	0	5	22	1		0	0	16	0	0	0	0	2	2	0	2	3	0	3	0
117	2017-10-01	2017	10	101	1	26	0	2	17	1		0	0	11	0	0	0	0	3	8	1	0	0	0	4	0
118	2017-10-03	2017	10	101	1	79.2	0	4	22	0	20	1	1	20	0	0	0	1	1	9	3	0	3	0	2	1
119	2017-10-04	2017	10	101	0	51.3	0	2	9	1		0	0	20	0	0	0	0	2	5	0	0	0	0	3	0
120	2017-10-04	2017	10	101	0	82.9	0	5	25	1		1	10	27	1	4	4	1	2	5	0	0	3	0	4	0
121	2017-10-05	2017	10	101	1	28.7	0	5	17	1		0	0	5	0	0	0	0	1	9	0	0	3	2	2	0
122	2017-11-07	2017	11	111	1	42.8	1	4	9	1		0	0	3	0	0	0	0	2	1	0	0	0	0	3	0
123	2017-11-07	2017	11	111	1	41.2	0	2	34	1		1	6	16	0	0	0	1	1	9	4	1	3	3	2	0
124	2017-11-29	2017	11	112	1	41.4	1	4	57	1		1	8	28	1	1	3	1	3	8	2	0	4	4	5	0
125	2017-12-11	2017	12	121	1	44.6	1	4	27	1		1	2	22	0	0	0	1	2	2	3	0	3	2	3	0
126	2017-12-16	2017	12	122	1	67.8	1	4	9	1		0	0	1	0	0	0	0	2	1	0	0	0	0	3	0
127	2017-12-22	2017	12	122	0	48.8	1	7	9	1		0	0	21	0	0	0	0	2	1	0	0	0	0	3	0
128	2018-01-16	2018	1	12	1	41	0	3	16	1		0	0	23	0	0	0	0	2	2	0	0	0	0	4	0
129	2018-01-22	2018	1	12	1	16	1	4	4	1		0	0	7	0	0	0	0	1	9	0	0	0	0	2	0
130	2018-02-22	2018	2	22	0	16	1	7	17	1		0	0	5	0	0	0	0	2	1	2	0	2	0	3	0
131	2018-03-27	2018	3	32	1	90	1	4	19	1		0	0	21	0	0	0	0	2	2	1	0	3	0	3	0
132	2018-04-04	2018	4	41	0	52	0	1	30	1		1	6	32	1	2	5	1	3	6	0	0	1	2	5	0
133	2018-04-06	2018	4	41	1	37	0	5	17	1		0	0	75	0	0	0	0	2	1	0	0	2	2	3	0
134	2018-04-07	2018	4	41	1	84	1	5	17	1		0	0	17	0	0	0	0	1	9	0	0	3	2	2	0
135	2018-04-13	2018	4	41	1	37	0	5	29	1		1	11	20	0	0	2	0	3	1	0	0	3	2	4	1
136	2018-04-14	2018	4	41	0	38	0	5	8	1		0	0	1	0	0	0	0	1	9	0	0	0	2	2	0
137	2018-05-21	2018	5	52	1	28	0	5	24	1		1	37	93	1	0	0	0	3	2	0	0	2	2	4	1
138	2018-06-04	2018	6	61	0	25	0	5	6	1		0	0	1	0	0	0	0	1	9	1	0	1	0	2	0
139	2018-06-06	2018	6	61	0	20	0	2	17	1		0	0	7	0	0	0	0	1	9	3	0	2	0	2	1
140	2018-06-11	2018	6	61	1	60	0	5	34	1		1	11	24	0	0	0	0	2	5	0	0	3	3	4	0
141	2018-06-14	2018	6	61	0	63	0	2	24	1		0	0	23	0	0	0	0	2	5	0	0	2	2	4	0
142	2018-06-23	2018	6	62	1	71	1	4	50	0	1	1	1	1	1	0	0	0	2	1	5	4	3	2	3	1
143	2018-06-26	2018	6	62	1	24	1	4	14	1		0	0	12	0	0	0	0	2	1	2	0	0	0	3	1
144	2018-08-29	2018	8	82	0	46	0	5	66	0	1	0	0	1	1	0	0	0	2	1	5	3	5	4	3	0
145	2018-09-02	2018	9	91	0	26	1	4	50	1		1	4	20	1	2	2	0	3	3	3	0	4	0	5	1
146	2018-09-11	2018	9	91	0	43	0	2	16	1		0	0	12	1	0	0	0	3	8	0	0	0	0	4	0
147	2018-09-14	2018	9	91	1	50	0	3	38	1		1	2	13	0	0	0	0	2	1	0	0	5	2	3	1
148	2018-09-15	2018	9	91	0	30	0	2	27	1		1	5	17	0	0	0	0	1	9	3	0	3	3	2	1
149	2018-09-16	2018	9	92	1	68	1	4	41	1		1	37	58	1	2	2	0	2	1	4	1	2	3	4	0
150	2018-10-01	2018	10	101	1	23	1	2	50	0	5	1	5	5	1	3	6	0	1	9	5	2	4	3	2	0
151	2018-10-10	2018	10	101	1	75	1	5	22	1		0	0	13	0	0	0	0	2	1	3	0	0	2	3	0
152	2018-10-24	2018	10	102	0	34	1	2	19	1		1	3	10	0	0	0	0	2	1	0	0	0	3	3	1
153	2018-11-03	2018	11	111	0	26	1	4	66	0	1	0	0	1	1	n.a.	n.a.	0	3	1	5	2	4	4	5	0
154	2018-11-06	2018	11	111	1	53	0	4	4	1		0	0	1	0	0	0	0	1	9	0	0	0	0	2	0
155	2018-11-11	2018	11	111	1	42	0	5	34	1		1	10	13	0	0	0	0	2	1	4	3	3	0	3	1
156	2018-12-04	2018	12	121	1	43	1	2	29	0	8	1	4	8	0	0	0	1	2	2	2	0	3	0	4	0
157	2018-12-19	2018	12	122	1	21	0	5	29	1		0	0	18	0	0	0	0	2	1	0	0	2	4	3	1
158	2019-02-20	2019	2	22	1	44	1	2	34	1		1	11	92	1	6	10	1	2	5	0	0	3	4	3	0
159	2019-03-03	2019	3	31	0	22	1	5	32	1		0	0	32	0	0	0	1	2	3	0	0	4	0	4	0
160	2019-03-11	2019	3	31	0	29	0	2	20	1		1	1	31	1	0	0	1	2	5	0	0	0	2	4	0
161	2019-03-25	2019	3	32	0	49	1	5	16	1		0	0	132	0	0	0	1	2	1	0	0	0	0	4	0
162	2019-03-25	2019	3	32	1	77	1	4	22	1		0	0	45	0	0	0	0	2	1	2	0	3	0	3	1
163	2019-04-02	2019	4	41	1	35	0	5	13	1		1	1	16	0	0	0	0	2	1	0	0	0	2	3	0
164	2019-04-08	2019	4	41	1	27	0	6	20	1		1	2	40	0	0	0	0	2	1	0	0	0	2	4	0
165	2019-04-26	2019	4	42	1	66	1	4	17	1		1	1	4	0	0	0	0	2	1	2	2	0	0	3	0
166	2019-04-26	2019	4	42	0	56	1	4	10	1		0	0	15	0	0	0	1	2	2	1	0	0	0	3	0
167	2019-05-16	2019	5	52	0	72	1	4	17	1		0	0	2	0	0	0	0	1	9	3	0	2	0	2	0
168	2019-05-18	2019	5	52	1	52	1	2	10	1		0	0	26	0	0	0	1	2	1	0	0	0	0	3	1
169	2019-05-24	2019	5	52	1	52	0	1	41	1		1	13	51	1	5	15	0	3	3	2	0	3	4	4	1
170	2019-05-27	2019	5	52	1	91	0	5	27	0	9	0	0	9	0	0	0	1	2	1	3	0	3	0	3	2
171	2019-05-28	2019	5	52	1	62	1	4	24	1		0	0	92	0	0	0	1	2	3	2	0	2	0	4	0
172	2019-06-02	2019	6	61	1	29	0	1	29	1		1	1	30	1	0	0	0	2	1	2	1	3	2	4	2
173	2019-06-07	2019	6	61	1	40	1	2	9	1		0	0	34	0	0	0	0	2	1	0	0	0	0	3	0
174	2019-06-07	2019	6	61	0	53	0	2	38	1		1	5	78	0	0	2	0	3	6	0	0	3	2	5	0
175	2019-06-18	2019	6	62	0	24	0	5	9	1		0	0	15	0	0	0	1	2	3	0	0	0	0	3	0
176	2019-06-26	2019	6	62	1	35	1	5	24	1		1	2	42	0	0	0	0	1	9	0	0	2	4	2	0
177	2019-07-13	2019	7	71	0	49	0	5	27	1		1	19	32	1	3	3	1	2	6	3	0	3	2	3	0
178	2019-07-16	2019	7	72	0	29	0	2	24	1		1	5	73	0	0	0	0	2	5	0	0	2	2	4	0
179	2019-07-24	2019	7	72	1	83	1	5	21	1		0	0	48	1	0	0	1	1	1	1	0	4	0	2	1
180	2019-07-25	2019	7	72	1	64	1	5	13	1		0	0	72	1	0	0	0	2	1	0	0	0	2	3	0
181	2019-08-08	2019	8	81	0	60	0	5	66	0	23	1	23	23	1	7	23	1	3	8	5	0	4	2	5	0
182	2019-08-09	2019	8	81	1	34	1	3	22	1		0	0	57	0	0	0	0	2	1	3	2	0	2	3	1
183	2019-08-25	2019	8	82	1	61	1	4	10	1		0	0	30	0	0	0	0	2	1	0	0	0	0	3	1
184	2019-09-12	2019	9	91	1	83	1	4	66	0	1	0	0	1	1	0	0	0	2	1	5	0	4	0	5	0
185	2019-09-15	2019	9	91	0	68	0	2	18	1		0	0	2	1	0	0	1	2	1	0	0	3	0	3	0
186	2019-10-14	2019	10	101	1	44	1	4	17	1		0	0	35	1	0	0	0	2	1	2	0	0	2	3	1
187	2019-11-08	2019	11	111	0	16	0	4	50	0	1	1	1	1	1	3	3	0	1	9	5	0	4	2	3	0
188	2019-11-11	2019	11	111	0	29	1	4	17	1		1	1	68	0	0	0	0	2	1	2	0	0	2	3	1
189	2019-11-20	2019	11	112	1	24	0	3	26	1		0	0	77	0	0	0	0	3	7	0	0	0	3	4	1
190	2019-11-21	2019	11	112	0	49	0	5	16	1		0	0	15	0	0	0	0	3	8	0	0	0	0	4	0
191	2019-11-26	2019	11	112	0	23	1	5	9	1		0	0	2	0	0	0	0	2	1	0	0	0	0	3	0
192	2019-11-30	2019	11	112	0	41	0	4	22	1		1	3	20	0	0	0	0	2	1	0	2	3	2	3	1
193	2019-12-10	2019	12	121	0	27	1	2	10	1		0	0	39	0	0	0	0	2	1	1	0	0	0	3	0
194	2020-01-04	2020	1	11	0	18.6685	0	1	41	1		1	19	19	1	0	0	1	2	1	3	0	4	4	3	0
195	2020-02-05	2020	2	21	1	18.5589	0	5	24	1		0	0	4	1	0	1	0	2	1	0	0	2	2	4	1
196	2020-02-12	2020	2	21	1	52.011	0	2	13	1		0	0	8	0	0	0	0	1	9	2	0	0	0	3	0
197	2020-02-14	2020	2	21	0	41.5808	0	51	13	1		0	0	4	0	0	0	0	2	1	2	0	0	0	3	0
198	2020-03-05	2020	3	31	0	22	1	2	29	1		0	0	15	1	2	2	0	3	6	0	0	0	2	5	0
199	2020-04-08	2020	4	41	1	16.8849	1	5	9	1		0	0	9	0	0	0	0	2	1	0	0	0	0	3	0
200	2020-05-06	2020	5	51	1	63.1562	0	5	41	1		1	7	14	1	0	1	0	3	7	4	0	3	1	4	1
201	2020-05-19	2020	5	52	1	63.5288	0	2	20	1		0	0	14	0	0	0	0	2	5	0	0	0	2	4	0
202	2020-05-25	2020	5	52	1	62.9096	0	2	9	1		0	0	9	0	0	0	0	2	1	0	0	0	0	3	0
203	2020-05-27	2020	5	52	0	57.2795	1	2	13	1		0	0	1	0	0	0	0	2	1	2	0	0	0	3	0
204	2020-06-05	2020	6	61	1	28.5726	1	3	45	1		1	3	14	1	0	0	0	3	2	5	0	2	0	4	1
205	2020-06-16	2020	6	62	1	60.7068	0	2	34	1		1	7	21	0	0	2	1	3	6	2	0	3	3	4	0
206	2020-07-02	2020	7	71	0	22.2055	0	2	41	1		1	7	15	0	0	0	0	3	3	0	3	4	2	4	0
207	2020-07-14	2020	7	71	1	55.1808	0	2	19	1		0	0	22	0	0	0	1	2	1	1	0	3	0	3	1
208	2020-08-26	2020	8	82	0	72.1507	0	3	22	0	26	1	19	26	1	0	5	1	2	1	0	0	3	2	3	0
209	2020-09-12	2020	9	91	1	48.5425	0	2	8	1		0	0	7	0	0	0	0	1	9	0	0	2	0	2	0
210	2020-09-14	2020	9	91	1	28.0274	0	5	75	1		1	31	85	1	4	15	1	3	8	5	2	5	3	5	0
211	2020-09-21	2020	9	92	1	44.274	1	6	13	1		0	0	10	0	0	0	0	2	5	2	0	0	0	3	0
212	2020-09-28	2020	9	92	0	44.0055	1	5	21	1		1	2	50	0	0	1	1	3	8	0	0	2	1	4	1
213	2020-09-28	2020	9	92	1	51.4658	0	2	18	1		0	0	12	0	0	0	0	2	5	0	0	0	3	3	0
214	2020-10-27	2020	10	102	1	41.6795	1	4	29	1		0	0	45	0	0	0	1	3	8	3	2	1	2	4	1
215	2020-11-09	2020	11	111	1	18.6548	1	5	21	1		0	0	4	0	0	0	0	3	8	2	0	0	1	4	0
216	2020-11-21	2020	11	112	1	59.1808	0	3	29	1		0	0	6	0	0	0	0	2	1	2	2	4	0	3	1

## Sheet: Dictionnaire
	Nom de la variable	Description de la variable	Codage numérique
1	ID	Identifiant des patients
2	Accident_Date	Date de l'accident
3	Year	Année de l'accident
4	Accident_date_monthly_coded	Codage mensuel de la date d'accident	1=janvier; 2=février; 3=mars; 4=avril; 5=mai; 6=juin; 7=juillet; 8=août; 9=septembre; 10=octobre; 11=novembre; 12=décembre
5	Accident_date_bi-monthly_coded	Codage bi-mensuel de la date d'accident	11=1-15 janvier; 12=16-fin janvier; 21=1-15 février; 22=16-fin février; 31=1-15 mars; 32=16-fin mars; 41=1-15 avril; 42=16-fin avril; 51=1-15 mai; 52=16-fin mai; 61=1-15 juin; 62=16-fin juin; 71=1-15 juillet; 72=16-fin juillet; 81=1-15 août; 82=16-fin août; 91=1-15 septembre; 92=16-fin septembre; 101=1-15 octobre; 102=16-fin octobre; 111=1-15 novembre; 112=16-fin novembre; 121=1-15 décembre; 122=…
6	Residence	Domicile	0=pas à Genève; 1=à Genève
7	Age	Age lors de l'accident (en années)
8	Gender	Sexe	0=homme; 1=femme
9	Trauma_mechanism	Mécanisme de l'accident	1=AVP voiture; 2=AVP moto; 3=AVP vélo; 4=AVP piéton; 5=chute>hauteur; 51=chute à ski; 6=chute de sa hauteur; 8=AVP autre (train, bateau); 9=struck by; 10=arme à feu; 11=arme blanche; 12=autres; 999=inconnu
10	ISS	Score ISS
11	Survivor	Survivant	0=non; 1= oui
12	Δ_day_to_death	Délai entre admission et décès (en jours)
13	ICU	Séjour aux soins intensifs	0=non; 1= oui
14	ICU_stay	Durée de séjour aux soins intensifs (en jours)
15	Hosp_length	Durée totale d'hospitalisation, sans rééducation (en jours)
16	HD_Instability	Instabilité hémodynamique (TAsys prehosp < 90 ou FC prehosp > 100 ou concentrés érythrocytaires aux urgences)	0=non; 1= oui
17	PRBC_ED	Nombre de concentrés érythrocytaires aux urgences
18	PRBC_first_24_hours	Nombre de concentrés érythrocytairespendant les 24 premières heures
19	Complications	Complication durant l'hospitalisation
20	AO_classification	Classification AO de la fracture de l'anneau pelvien (selon code AIS)	1=type A; 2=type B; 3=type C
21	YB_classification	Classification Young & Burgess	1=LC1 (lateral compression type 1); 2=LC2 (lateral compression type 2); 3=LC3 (lateral compression type 3); 4=APC1 (antero-posterior compression type 1); 5=APC2 (antero-posterior compression type 2); 6=APC3 (antero-posterior compression type 3); 7=VS (vertical shear); 8=CM (combined mechanism); 9=non classable
22	Highest_AIS_Head_&_Neck	Score AIS maximal Tête et Cou
23	Highest_AIS_Face	Score AIS maximal Face
24	Highest_AIS_Chest	Score AIS maximal Thorax
25	Highest_AIS_Abdomen	Score AIS maximal Abdomen
26	Highest_AIS_Extremities_&_Pelvic_Girdle	Score AIS maximal Extrémités et Ceinture Pelvienne
27	Highest_AIS_External	Score AIS maximal Externe
